# Supplementary material for: Midkine Attenuates Aβ Fibril Assembly and AmyloidPlaque Formation
Source: PubMed Central journal article supplement (PMC11177971; doi:10.21203/rs.3.rs-4361125/v1), 2024-06-07
Supplement: NIHPPrs4361125v1-supplement-1.pdf [file NIHPPrs4361125v1-supplement-1.pdf]

## Supplementary Files

This is a list of supplementary files associated with this preprint. Click to download.

- [MDKExtendedDataTablesV1.0.0.xlsx](#)
- [ExtendedDataFig.docx](#)
